# Supplementary material for: Dinuclear Ir(iii) complexes with asymmetrical bridging ligands as highly efficient phosphors for single-layer electroluminescent devices
Source: Royal Society of Chemistry journal article supplement (doi:10.1039/c9tc04556b), 2019-01-01
Supplement: c9tc04556b1.pdf [file c9tc04556b1.pdf]

## Supplementary Information

### **Dinuclear Ir(III) complexes with asymmetrical bridging ligands as highly efficient phosphors for single-layer electroluminescent devices**

Hui-Ting Mao,<sup>a</sup> Yang Cui,<sup>a</sup> Guang-Fu Li,<sup>a</sup> Guo-Gang Shan,<sup>a,\*</sup> Qun-Ying Zeng,<sup>b,\*</sup> Fu-Shan Li,<sup>b</sup> Zhong-Min Su,<sup>a, c\*</sup>

<sup>a</sup> *Institute of Functional Material Chemistry and National & Local United Engineering Lab for Power Battery, Faculty of Chemistry, Northeast Normal University, Changchun 130024, P. R. China. E-mail: shangg187@nenu.edu.cn (G. Shan); zmsu@nenu.edu.cn (Z. Su)*

<sup>b</sup> *Institute of Optoelectronic Technology, FuZhou University, FuZhou, 350002, P. R. China. E-mail: qyzeng@fzu.edu.cn (Q. Zeng)*

<sup>c</sup> *Jilin Provincial Science and Technology Innovation Center of Optical Materials and Chemistry, School of Chemistry and Environmental Engineering, Changchun University of Science and Technology Changchun, 130022, P. R. China.*

## Table of Contents

1. **Experimental section**
2. **Scheme S1.** Synthetic routes of **L1** and **L2**.
3. **Scheme S2.** Synthetic routes of **s-DIr1-dfppz**, **as-DIr2-dfppz**, and **as-DIr3-ppy**.
4. **Scheme S3.** Chemical structures of the mononuclear Ir(III) complexes.
5. **Table S1.** Photophysical properties of the mononuclear Ir(III) complexes.
6. **Table S2.** Crystal data and structure refinement of **s-DIr1-dfppz**.
7. **Figure S1.** <sup>1</sup>H NMR spectrum of **s-DIr1-dfppz** in DMSO-*d*<sub>6</sub>.
8. **Figure S2.** <sup>1</sup>H NMR spectrum of **as-DIr2-dfppz** in DMSO-*d*<sub>6</sub>.
9. **Figure S3.** <sup>1</sup>H NMR of spectrum **as-DIr3-ppy** in DMSO-*d*<sub>6</sub>.
10. **Figure S4.** PL spectra of the dinuclear Ir(III) complexes at 77 K.
11. **Figure S5.** PL spectra of **s-DIr1-dfppz** and **as-DIr2-dfppz** in CH<sub>3</sub>CN/water mixtures with different water fractions (*f*<sub>w</sub>).
12. **Figure S6.** Electron density contours and spin-density distribution calculated for the lowest triplet state of **s-DIr1-dfppz**, **as-DIr2-dfppz**, and **as-DIr3-ppy**.
13. **Figure S7.** Difference electron density (0.003 e·bohr<sup>-3</sup>) computed by subtracting the electron densities of the T<sub>1</sub> and S<sub>0</sub> states for **s-DIr1-dfppz**, **as-DIr2-dfppz**, and **as-DIr3-ppy**.
14. **Table S3.** Calculated energy levels, oscillator strengths, and orbital transition analyses of T<sub>1</sub> states for **s-DIr1-dfppz**, **as-DIr2-dfppz**, and **as-DIr3-ppy**.
15. **Figure S8.** Chemical structures of the dinuclear Ir(III) complexes and the corresponding performances of solution-processed devices in reported works.
16. **Table S4.** Summary of representative performances of solution-processed devices based on dinuclear Ir(III) complexes in reported works.

## Experimental section

### General Methods

All reagents and solvents were procured from commercial sources and used without further purification. All reactions were performed under a Ar<sub>2</sub> atmosphere. <sup>1</sup>H NMR spectra were recorded on a Bruker Avance 500 MHz spectrometer with tetramethylsilane (TMS) as an internal standard. Mass spectra data was measured on matrix-assisted laser desorption-ionization time-of-flight (MALDI-TOF) mass spectrometry. UV-vis absorption spectra and PL emission spectra of these dinuclear cationic Ir(III) complexes were recorded on Cary 500 UV-Vis-NIR spectrophotometer and FL-4600 FL spectrophotometer, respectively.

### Single Crystal X-Ray Diffraction Analysis

Single crystal of *s-DIr1-dfppz* was cultivated from CH<sub>2</sub>Cl<sub>2</sub>, CH<sub>3</sub>OH and ether solutions by slowly evaporating the solutions. The single-crystal X-ray diffraction data for the dinuclear cationic Ir(III) complex was obtained on a Bruker Apex CCD II area-detector diffractometer. The structures were refined by the full-matrix least-square on the SHELXL-97 program.

### Theoretical calculations

Theoretical calculations on the ground and excited electronic states of the dinuclear Ir(III) complexes *s-DIr1-dfppz*, *as-DIr2-dfppz*, and *as-DIr3-ppy* were carried out using density functional theory (DFT) at the B3LYP level. A Double- $\xi$  quality basis set containing LANL2DZ was employed for Ir atom, while a 6-31G\* basis set for other atoms. Theoretical calculations were performed with the Gaussian 09 software package.

### Electrochemical Measurements

Electrochemical measurements of the dinuclear cationic Ir(III) complexes were performed using cyclic voltammetry (CV) and recorded in CH<sub>3</sub>CN solution (10<sup>-3</sup> M) with a scan rate of 100 mV s<sup>-1</sup>. Tetrabutylammonium perchlorate (Bu<sub>4</sub>NClO<sub>4</sub>) (0.1 M) in CH<sub>3</sub>CN was used as the supporting electrolyte and the ferrocene acted as the internal standard. The HOMO/LUMO energy levels and the energy gap ( $\Delta E$ ) of the complexes were calculated from the first oxidation potential ( $E_{ox}$ ) and first reduction ( $E_{red}$ ) potential.

### Synthesis of L1

2-(pyridin-2-yl)-1*H*-benzo[d]imidazole (6.00 g, 30.73 mmol), K<sub>2</sub>CO<sub>3</sub> (4.25 g, 30.73 mmol), and KOH (1.72 g, 30.73 mmol) were dissolved in acetone. After the mixture was stirred and refluxed for 1 h, 1,4-dibromobutane (4.40 mL, 36.88 mmol) in acetone was added and then the mixture was refluxed overnight under Ar<sub>2</sub> atmosphere. The solvent was removed in vacuo and the residue was extracted by CH<sub>2</sub>Cl<sub>2</sub>, and column chromatography gave the intermediate product (1-(4-bromobutyl)-2-(pyridin-2-yl)-1*H*-benzo[d]imidazole). Then, 2-(pyridin-2-yl)-1*H*-benzo[d]imidazole (1.41 g, 4.27 mmol), K<sub>2</sub>CO<sub>3</sub> (0.59 g, 4.27 mmol), and KOH (0.24 g, 4.27 mmol) were added to acetone solution. After the mixture was stirred and refluxed for 1 h, intermediate product (1-(4-bromobutyl)-2-(pyridin-2-yl)-1*H*-benzo[d]imidazole) (1.00 g, 5.12 mmol) in acetone was added and then the mixture was refluxed overnight under Ar<sub>2</sub> atmosphere. The solvent was removed under vacuum and the the resulting solid was extracted with CH<sub>2</sub>Cl<sub>2</sub>. The organic layer was collected and dried with Na<sub>2</sub>SO<sub>4</sub>. The solvent was removed in vacuo, and then the residue was purified by silica gel column chromatography to afford a white powder with a yield of 80%. <sup>1</sup>H NMR (500 MHz, CDCl<sub>3</sub>, δ [ppm]): 8.54-8.55 (m, 2H), 8.40 (d, *J* = 8.0 Hz, 2H), 7.08-7.85 (m, 4H), 7.37-7.38 (m, 2H), 7.26-7.33 (m, 6H), 4.86 (t, *J* = 7.0 Hz, 4H), 2.01 (t, *J* = 7.0 Hz, 4H). MS [m/z]: Calcd for C<sub>28</sub>H<sub>24</sub>N<sub>6</sub>: 444.2, Found 444.2 [M]<sup>+</sup>.

**Synthesis of L2** Yield 73%. <sup>1</sup>H NMR (500 MHz, CDCl<sub>3</sub>, δ [ppm]): 8.56-8.61 (m, 2H), 8.39 (d, *J* = 8.0 Hz, 1H), 8.30-8.32 (m, 1H), 8.16 (d, *J* = 7.5 Hz, 2H), 7.77-7.84 (m, 3H), 7.39-7.47 (m, 4H), 7.24-7.32 (m, 4H), 4.88-4.92 (m, 4H), 1.99-2.10 (m, 4H). MS [m/z]: Calcd for C<sub>29</sub>H<sub>25</sub>N<sub>7</sub>: 471.2, Found 471.2 [M]<sup>+</sup>.

**Synthesis of s-DIr1-dfppz.** dfppz (2.52 g, 14.00 mmol) and IrCl<sub>3</sub>·3H<sub>2</sub>O (2.12 g, 6.00 mmol) were added to a 250 mL round-necked flask. Then 2-ethoxyethanol (120 mL) and water (40 mL) were added to the flask sequentially. The mixture was refluxed for 24 h under Ar<sub>2</sub> atmosphere. After cooling, the resulting precipitate was collected by filtration and washed with water and ethanol. The dried chloro-bridged dimer (0.58 g, 0.50 mmol) and L1 (0.20 g, 0.45 mmol) in ethylene glycol were heated to 150 °C for 12 h under Ar<sub>2</sub> in the dark. After cooling to room temperature, the reaction mixture was poured into saturated aqueous NH<sub>4</sub>PF<sub>6</sub> solution, resulting in a green suspension. The suspension was filtered and extracted with CH<sub>2</sub>Cl<sub>2</sub>. The crude product was purified by silica gel column chromatography using CH<sub>3</sub>COOC<sub>2</sub>H<sub>5</sub>:CH<sub>2</sub>Cl<sub>2</sub> in 1:1 (v:v) ratio as the eluent to afford the desired Ir(III) complex. Yield 75%. <sup>1</sup>H NMR (500 MHz, *d*<sub>6</sub>-DMSO,

ppm):  $\delta$  8.59-8.67 (m, 4H), 8.58 (d,  $J = 3.0$  Hz, 2H), 8.28-8.33 (m, 2H), 8.20 (d,  $J = 5.0$  Hz, 2H), 7.95 (t,  $J = 7.5$  Hz, 2H), 7.73-7.77 (m, 2H), 7.46-7.50 (m, 2H), 7.26-7.29 (m, 4H), 7.14-7.23 (m, 6H), 6.72-6.75 (m, 4H), 6.36 (d,  $J = 8.0$  Hz, 2H), 5.68-5.71 (m, 4H), 4.92-4.95 (m, 4H), 2.16-2.20 (m, 4H). MS [m/z]: Calcd for  $C_{64}H_{44}F_{20}Ir_2N_{14}P_2$ : 1836.2, Found 1836.2 [M]<sup>+</sup>. Anal. Calcd for  $C_{64}H_{44}F_{20}Ir_2N_{14}P_2$ : C, 41.88; H, 2.42; N, 10.68. Found: C, 41.82; H, 2.39; N, 10.72.

**Synthesis of *as-DIr2-dfppz*.** Yield 66%. <sup>1</sup>H NMR (500 MHz, *d*<sub>6</sub>-DMSO, ppm):  $\delta$  8.69-8.71 (m, 1H), 8.65 (s, 1H), 8.58-8.63 (m, 2H), 8.56 (s, 1H), 8.49 (d,  $J = 2.5$  Hz, 1H), 8.37 (t,  $J = 8.0$  Hz, 1H), 8.26-8.32 (m, 1H), 8.15-8.18 (m, 1H), 8.01 (t,  $J = 8.0$  Hz, 2H), 7.68-7.76 (m, 3H), 7.37-7.45 (m, 2H), 7.15-7.24 (m, 6H), 7.10-7.13 (m, 1H), 6.98-7.03 (m, 2H), 6.85-6.87 (m, 1H), 6.74-6.82 (m, 3H), 6.63-6.68 (m, 2H), 6.59-6.62 (m, 1H), 6.36 (m, 1H), 5.65 (t,  $J = 6.5$  Hz, 2H), 5.56 (t,  $J = 5.0$  Hz, 1H), 5.05 (d,  $J = 7.5$  Hz, 3H), 4.84-4.92 (m, 2H), 2.12-2.50 (m, 4H). MS [m/z]: Calcd for  $C_{65}H_{45}F_{20}Ir_2N_{15}P_2$ : 1863.2, Found 1863.2 [M]<sup>+</sup>. Anal. Calcd for  $C_{65}H_{45}F_{20}Ir_2N_{15}P_2$ : C, 41.92; H, 2.44; N, 11.28. Found: C, 41.85; H, 2.48; N, 11.25.

**Synthesis of *as-DIr3-ppy*.** Yield 72%. <sup>1</sup>H NMR (500 MHz, *d*<sub>6</sub>-DMSO, ppm):  $\delta$  8.71 (t,  $J = 9.5$  Hz, 1H), 8.58 (t,  $J = 9.0$  Hz, 1H), 8.33 (t,  $J = 8.0$  Hz, 1H), 8.28 (d,  $J = 8.5$  Hz, 2H), 8.23 (t,  $J = 8.0$  Hz, 2H), 8.14 (m, 1H), 7.98 (s, 2H), 7.88-7.95 (m, 5H), 7.86 (t,  $J = 8.5$  Hz, 1H), 7.78-7.82 (m, 2H), 7.70-7.76 (m, 3H), 7.60-7.69 (m, 3H), 7.33-7.39 (m, 2H), 7.21-7.27 (m, 1H), 6.96-7.13 (m, 7H), 6.87-6.92 (m, 5H), 6.78-6.85 (m, 3H), 6.65 (t,  $J = 7.5$  Hz, 1H), 6.56-6.61 (m, 1H), 6.25 (d,  $J = 8.0$  Hz, 1H), 6.20 (m, 2H), 6.03 (t,  $J = 8.0$  Hz, 1H), 5.85-5.88 (m, 1H), 5.04 (s, 2H), 4.86 (m, 2H), 2.06-2.19 (m, 4H). MS [m/z]: Calcd for  $C_{73}H_{57}F_{12}Ir_2N_{11}P_2$ : 1761.3, Found 1761.3 [M]<sup>+</sup>. Anal. Calcd for  $C_{73}H_{57}F_{12}Ir_2N_{11}P_2$ : C, 49.74; H, 3.26; N, 8.74. Found: C, 49.69; H, 3.21; N, 8.78.

**Synthesis of (dfppz)<sub>2</sub>IrL1:** Yield 76%. <sup>1</sup>H NMR (600 MHz, DMSO-*d*<sub>6</sub>,  $\delta$  [ppm]): 8.80 (d,  $J = 12.0$  Hz, 1H), 8.64 (d,  $J = 6.0$  Hz, 1H), 8.60 (d,  $J = 3.0$  Hz, 1H), 8.34-8.37 (m, 1H), 8.16 (d,  $J = 6.0$  Hz, 1H), 8.00 (d,  $J = 6.0$  Hz, 1H), 7.73 (t,  $J = 6.0$  Hz, 1H), 7.49 (t,  $J = 6.0$  Hz, 1H), 7.26 (d,  $J = 6.0$  Hz, 2H), 7.12-7.22 (m, 3H), 6.73-6.74 (m, 2H), 6.35 (d,  $J = 12.0$  Hz, 1H), 5.70-5.73 (m, 2H), 4.47 (s, 3H). MS (MALDI-TOF): m/z 760.2 (M-PF<sub>6</sub>).

**Synthesis of (dfppz)<sub>2</sub>IrL2:** Yield 65%. <sup>1</sup>H NMR (600 MHz, DMSO-*d*<sub>6</sub>,  $\delta$  [ppm]): 8.63-8.66 (m, 2H), 8.52 (d,  $J = 2.4$  Hz, 1H), 8.38 (t,  $J = 6.0$  Hz, 1H), 8.02 (d,  $J = 6.0$  Hz, 1H), 7.81 (d,  $J = 1.8$  Hz, 1H), 7.74 (t,  $J = 6.0$  Hz, 1H), 7.35 (s, 1H), 7.26 (t,  $J = 12.0$

Hz, 1H), 7.01-7.11 (m, 3H), 7.00 (d,  $J = 6.0$  Hz, 2H), 6.84 (t,  $J = 6.0$  Hz, 1H), 6.81 (t,  $J = 6.0$  Hz, 1H), 6.64-6.68 (m, 1H), 5.57 (d,  $J = 6.0$  Hz, 1H), 5.07 (d,  $J = 6.0$  Hz, 1H), 4.53 (s, 3H). MS (MALDI-TOF):  $m/z$  787.1 (M-PF<sub>6</sub>).

**Synthesis of (ppy)<sub>2</sub>IrL1:** Yield 80%. <sup>1</sup>H NMR (600 MHz, DMSO-*d*<sub>6</sub>,  $\delta$  [ppm]): 8.78 (d,  $J = 6.0$  Hz, 1H), 8.25-8.31 (m, 2H), 8.19 (d,  $J = 12.0$  Hz, 1H), 7.90-7.97 (m, 5H), 7.86 (t,  $J = 12.0$  Hz, 1H), 7.69-7.71 (m, 2H), 7.63 (d,  $J = 6.0$  Hz, 1H), 7.42 (t,  $J = 12.0$  Hz, 1H), 7.10-7.15 (m, 2H), 7.06 (t,  $J = 12.0$  Hz, 1H), 7.01-7.04 (m, 2H), 6.90-6.94 (m, 2H), 6.29 (d,  $J = 12.0$  Hz, 1H), 6.19-6.22 (m, 2H), 4.46 (s, 3H). MS (MALDI-TOF):  $m/z$  710.2 (M-PF<sub>6</sub>).

**Synthesis of (ppy)<sub>2</sub>IrL2:** Yield 78%. <sup>1</sup>H NMR (600 MHz, DMSO-*d*<sub>6</sub>,  $\delta$  [ppm]): 8.64 (d,  $J = 12.0$  Hz, 1H), 8.29-8.33 (m, 2H), 8.25 (d,  $J = 6.0$  Hz, 1H), 8.02 (d,  $J = 12.0$  Hz, 1H), 7.96 (t,  $J = 6.0$  Hz, 1H), 7.84-7.91 (m, 2H), 7.79 (d,  $J = 5.4$  Hz, 1H), 7.69 (t,  $J = 12.0$  Hz, 1H), 7.64 (d,  $J = 6.0$  Hz, 1H), 7.44 (d,  $J = 6.0$  Hz, 1H), 7.27 (t,  $J = 12.0$  Hz, 1H), 7.11-7.15 (m, 4H), 6.98 (t,  $J = 12.0$  Hz, 1H), 6.89 (t,  $J = 6.0$  Hz, 2H), 6.84 (t,  $J = 12.0$  Hz, 1H), 6.68 (t,  $J = 6.0$  Hz, 1H), 6.59 (t,  $J = 12.0$  Hz, 1H), 6.04 (d,  $J = 6.0$  Hz, 1H), 5.87 (d,  $J = 6.0$  Hz, 1H), 4.53 (s, 3H). MS (MALDI-TOF):  $m/z$  737.2 (M-PF<sub>6</sub>).

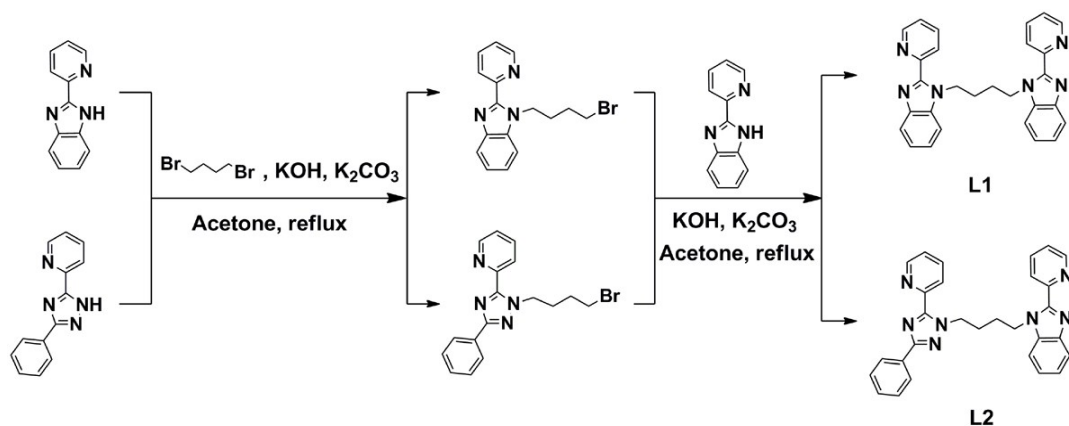

**Scheme S1.** Synthetic routes of L1 and L2.

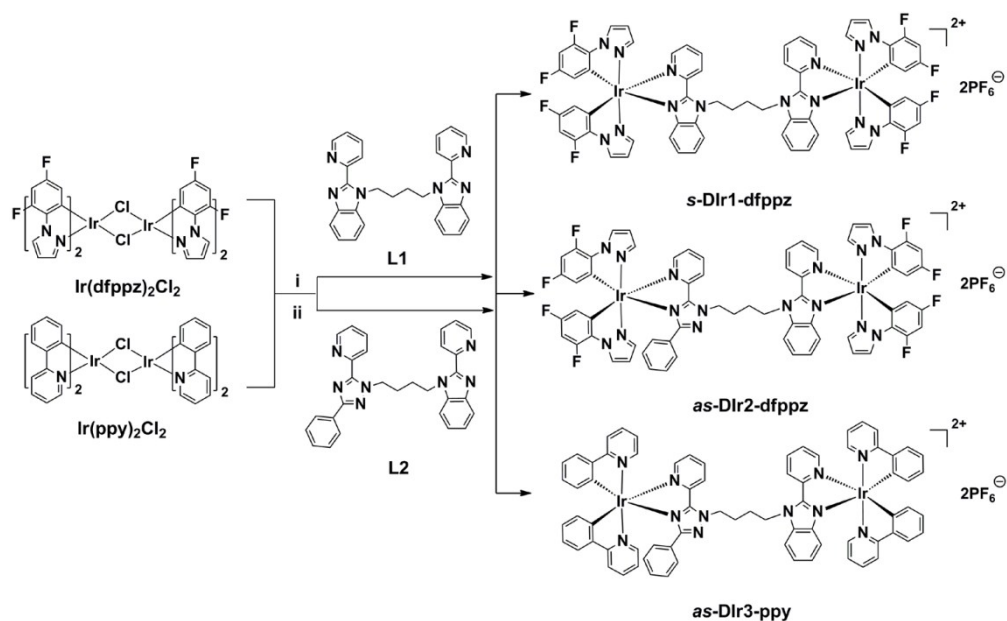

**Scheme S2.** Synthetic routes of  $s\text{-Dir1-dfppz}$ ,  $as\text{-Dir2-dfppz}$ , and  $as\text{-Dir3-ppy}$ . (i) ethylene glycol,  $150^\circ\text{C}$ , 12 h; (ii) aqueous  $\text{NH}_4\text{PF}_6$  solution.

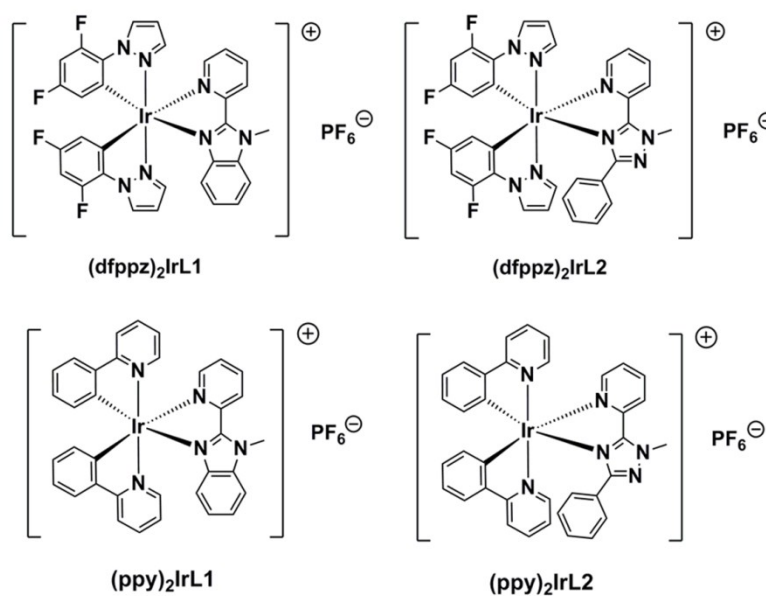

**Scheme S3.** Chemical structures of the mononuclear  $\text{Ir}(\text{III})$  complexes.

**Table S1.** Photophysical properties of the mononuclear Ir(III) complexes.

| Complexes                      | $\lambda_{\text{PL,max}}^{\text{a,b}}$<br>[nm] | $\Phi_{\text{p}}^{\text{a,b}}$<br>[%] | $\tau^{\text{a,b}}$<br>[ $\mu\text{s}$ ] |
|--------------------------------|------------------------------------------------|---------------------------------------|------------------------------------------|
| <b>(dfppz)<sub>2</sub>IrL1</b> | 525, 513                                       | 51, 77                                | 2.91, 3.90                               |
| <b>(dfppz)<sub>2</sub>IrL2</b> | 502, 484                                       | 27, 65                                | 2.25, 1.85                               |
| <b>(ppy)<sub>2</sub>IrL1</b>   | 571, 570                                       | 28, 40                                | 2.44, 1.90                               |
| <b>(ppy)<sub>2</sub>IrL2</b>   | 573, 553                                       | 13, 15                                | 7.38, 1.94                               |

<sup>a</sup> In CH<sub>3</sub>CN at 298 K. <sup>b</sup> In neat film at 298 K.

**Table S2.** Crystal data and structure refinement of *s-DIr1-dfppz*.

| Name                                                                             | <b>s-DIr1-dfppz</b>                                                                            |
|----------------------------------------------------------------------------------|------------------------------------------------------------------------------------------------|
| Identification code                                                              | CCDC 1901587                                                                                   |
| Formula                                                                          | C <sub>64</sub> H <sub>44</sub> F <sub>20</sub> Ir <sub>2</sub> N <sub>14</sub> P <sub>2</sub> |
| Formula weight                                                                   | 1835.47                                                                                        |
| Crystal system                                                                   | Triclinic                                                                                      |
| Space group                                                                      | P-1                                                                                            |
| Cell Lengths (Å)                                                                 | a 9.0935(6)                                                                                    |
|                                                                                  | b 13.5384(10)                                                                                  |
|                                                                                  | c 16.5246(11)                                                                                  |
| Cell Angles (°)                                                                  | $\alpha$ 66.373(3)                                                                             |
|                                                                                  | $\beta$ 79.409(3)                                                                              |
|                                                                                  | $\gamma$ 75.388(3)                                                                             |
| Cell Volume (Å <sup>3</sup> )                                                    | 1795.7(2)                                                                                      |
| Z                                                                                | 1                                                                                              |
| D <sub>calcd.</sub> (g m <sup>-3</sup> )                                         | 1.697                                                                                          |
| F(000)                                                                           | 890.0                                                                                          |
| R <sub>int</sub>                                                                 | 0.0833                                                                                         |
| Goodness-of-fit on F <sup>2</sup>                                                | 1.083                                                                                          |
| R <sub>1</sub> <sup>a</sup> , wR <sub>2</sub> <sup>b</sup> [I >= 2 $\sigma$ (I)] | 0.0557, 0.1185                                                                                 |
| R <sub>1</sub> , wR <sub>2</sub> [all data]                                      | 0.0791, 0.1312                                                                                 |

<sup>a</sup>  $R_1 = \sum ||F_o| - |F_c|| / \sum |F_o|$ . <sup>b</sup>  $wR_2 = \sqrt{\sum w(|F_o|^2 - |F_c|^2)^2} / \sum w(F_o^2)^{1/2}$ .



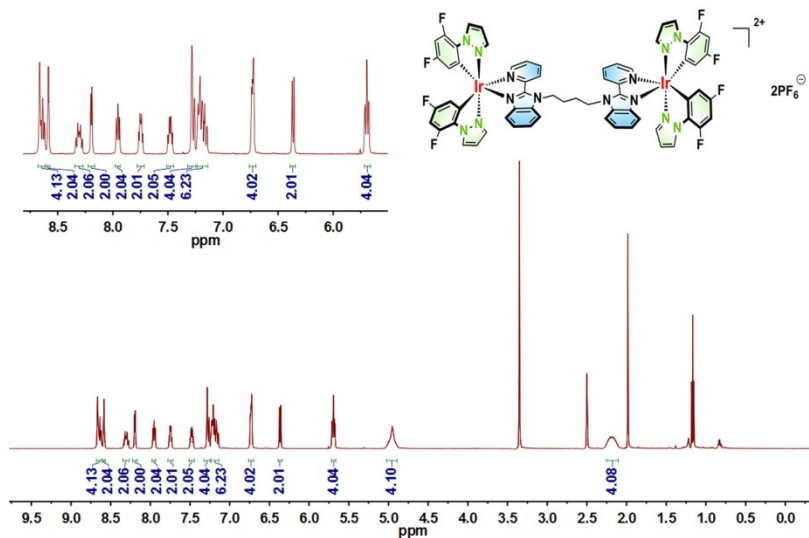

Figure S1.  $^1\text{H}$  NMR spectrum of *s*-DIr1-dfppy in  $\text{DMSO-}d_6$ .

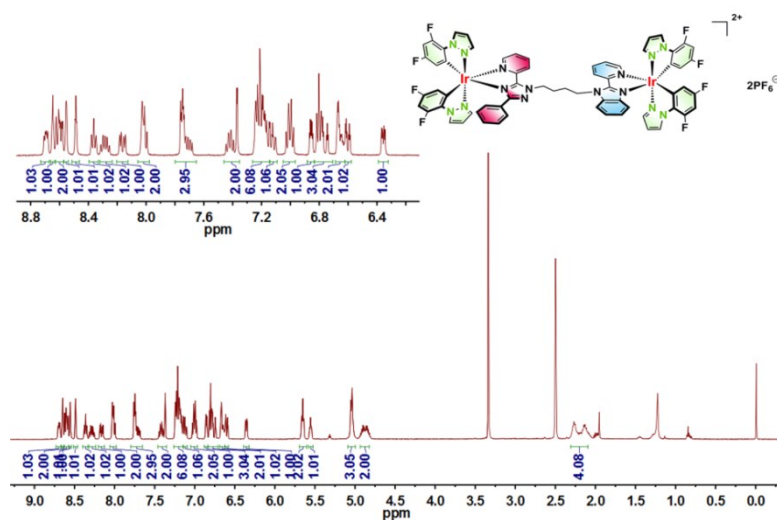

Figure S2.  $^1\text{H}$  NMR spectrum of *as*-DIr2-dfppy in  $\text{DMSO-}d_6$ .

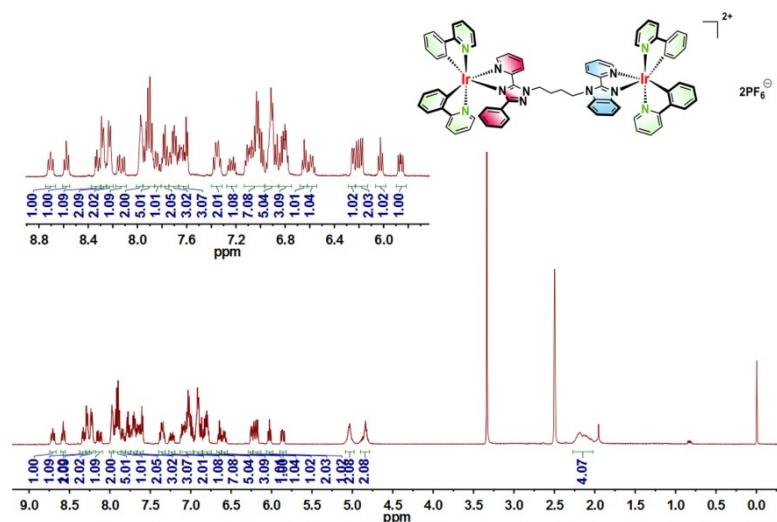

Figure S3.  $^1\text{H}$  NMR spectrum of *as-Dir3-ppy* in  $\text{DMSO-}d_6$ .

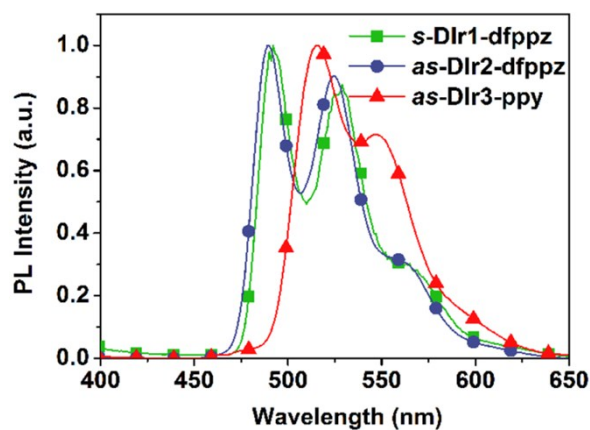

Figure S4. PL spectra of the dinuclear Ir(III) complexes at 77 K.

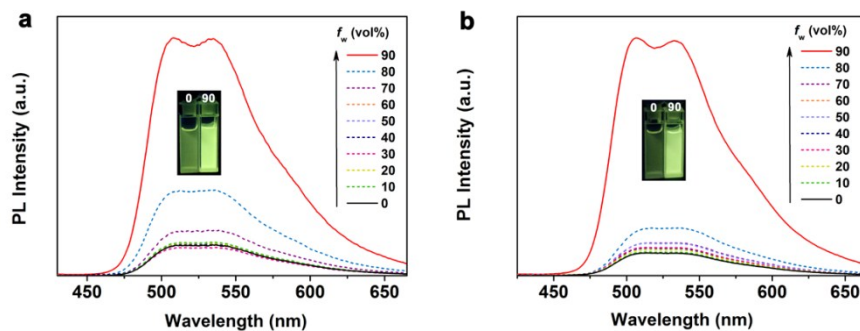

Figure S5. a) PL spectra of *s-Dir1-dfppz* in  $\text{CH}_3\text{CN}/\text{water}$  mixtures with different water fractions ( $f_w$ ). Inset: photos of *s-Dir1-dfppz* in  $\text{CH}_3\text{CN}/\text{water}$  mixtures ( $f_w = 0$  and 90%). b) PL spectra of *as-Dir2-dfppz* in  $\text{CH}_3\text{CN}/\text{water}$  mixtures. Inset: photos of *as-Dir2-dfppz* in  $\text{CH}_3\text{CN}/\text{water}$  mixtures ( $f_w = 0$  and 90%).

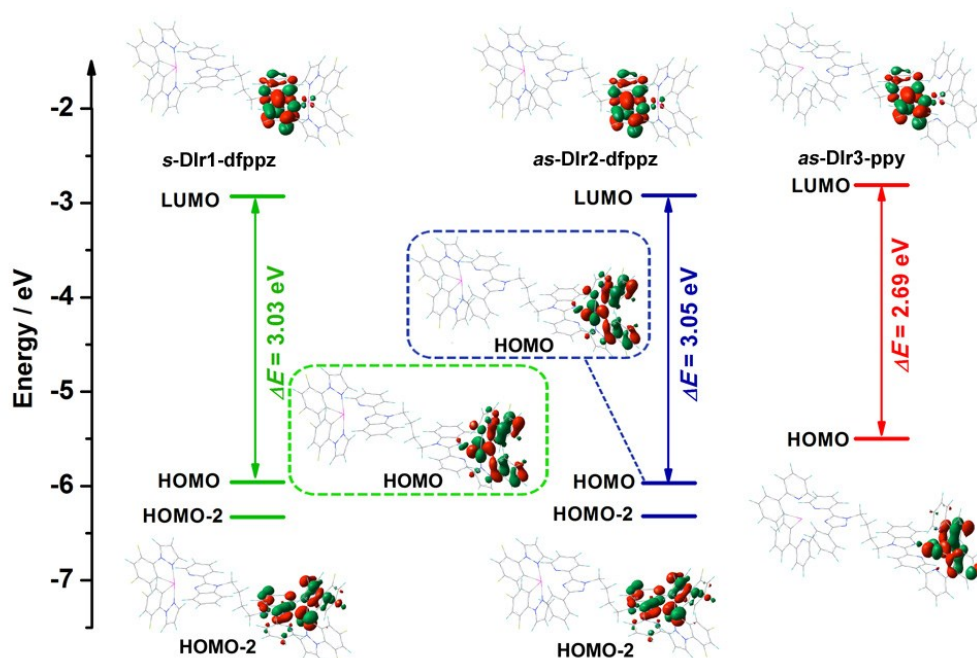

**Figure S6.** Electron density contours ( $0.04 \text{ e}\cdot\text{bohr}^{-3}$ ) calculated for HOMOs and LUMOs of *s-Dir1-dfppz*, *as-Dir2-dfppz*, and *as-Dir3-ppy*. HOMO-2 involved in the excitations for complexes *s-Dir1-dfppz* and *as-Dir2-dfppz* are also shown.

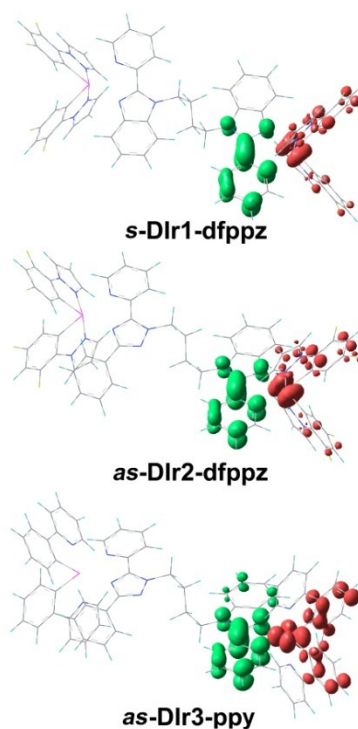

**Figure S7.** Difference electron density ( $0.003 \text{ e}\cdot\text{bohr}^{-3}$ ) computed by subtracting the electron densities of the  $T_1$  and  $S_0$  states for *s-Dir1-dfppz*, *as-Dir2-dfppz*, and *as-Dir3-ppy*. The charge goes from the red to the green areas.

**Table S3.** Calculated energy levels, oscillator strengths, and orbital transition analyses of T<sub>1</sub> states for **s-DIr1-dfppz**, **as-DIr2-dfppz**, and **as-DIr3-ppy**.

| Complex              | State          | eV   | <i>f</i> | Assignment <sup>a</sup> | Character                                               |
|----------------------|----------------|------|----------|-------------------------|---------------------------------------------------------|
| <b>s-DIr1-dfppz</b>  | T <sub>1</sub> | 2.16 | 0.00     | H→L (45%)               | <sup>3</sup> MLCT/ <sup>3</sup> LLCT                    |
|                      |                |      |          | H-2→L (42%)             | <sup>3</sup> MLCT/ <sup>3</sup> LLCT/ <sup>3</sup> ILCT |
| <b>as-DIr2-dfppz</b> | T <sub>1</sub> | 2.15 | 0.00     | H→L (44%)               | <sup>3</sup> MLCT/ <sup>3</sup> ILCT                    |
|                      |                |      |          | H-2→L (43%)             | <sup>3</sup> MLCT/ <sup>3</sup> LLCT/ <sup>3</sup> ILCT |
| <b>as-DIr3-ppy</b>   | T <sub>1</sub> | 1.99 | 0.00     | H→L (99%)               | <sup>3</sup> MLCT/ <sup>3</sup> LLCT                    |

<sup>a</sup> H and L denote the highest occupied molecular orbital (HOMO) and the lowest unoccupied molecular orbital (LUMO), respectively.

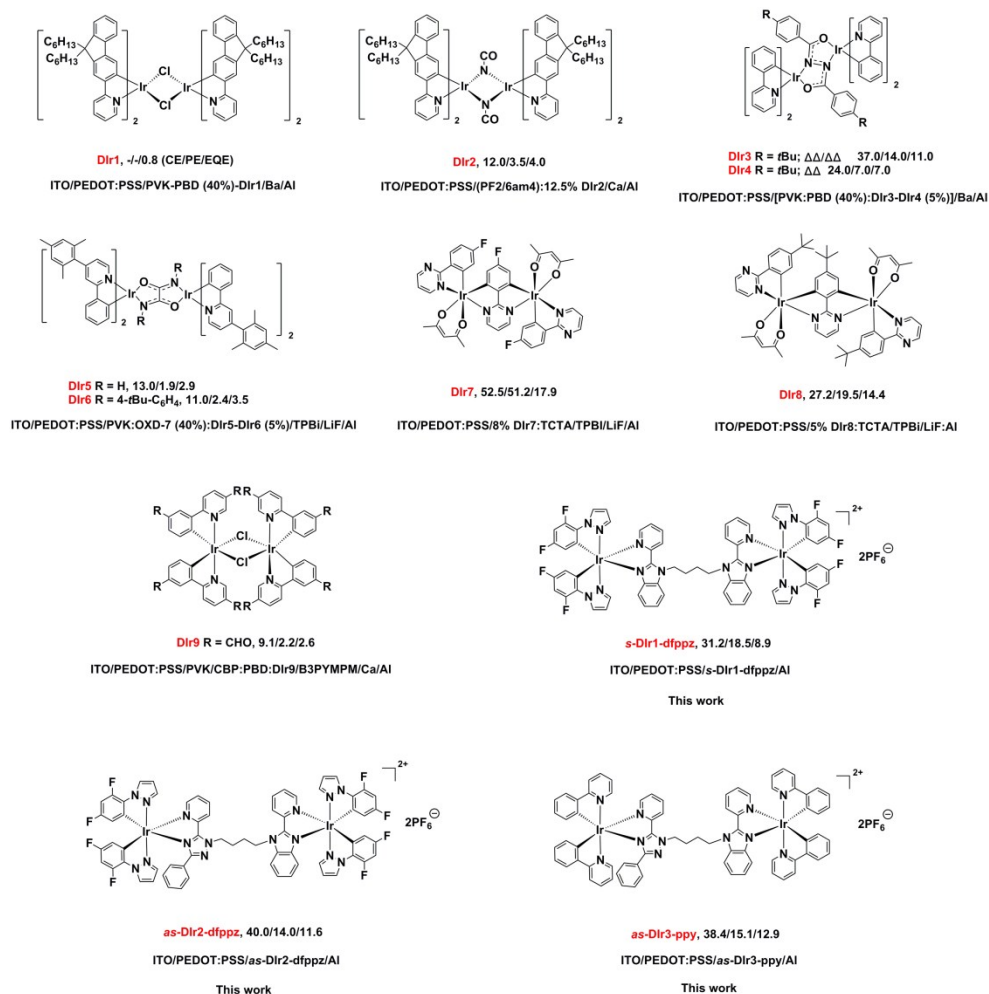

**Figure S8.** Chemical structures of the dinuclear Ir(III) complexes and the corresponding performances of solution-processed devices in reported works.

**Table S4.** Summary of representative performances of solution-processed devices based on dinuclear Ir(III) complexes in reported works.

| Complex                 | $V_{\text{turn-on}}^{\text{a}}$<br>(V) | $\lambda_{\text{max,em}}$<br>(nm) | $L_{\text{max}}^{\text{b}}$<br>( $\text{cd m}^{-2}$ ) | CE <sup>c</sup><br>( $\text{cd A}^{-1}$ ) | PE <sup>d</sup><br>( $\text{lm W}^{-1}$ ) | EQE <sup>e</sup><br>(%) | CIE <sup>f</sup> | Previous report       |
|-------------------------|----------------------------------------|-----------------------------------|-------------------------------------------------------|-------------------------------------------|-------------------------------------------|-------------------------|------------------|-----------------------|
| Dir1 (multilayer doped) | -                                      | 550                               | 13000                                                 | -                                         | -                                         | 0.8                     | -                | Ref [S1] <sup>1</sup> |
| Dir2 (multilayer doped) | 7.5                                    | 546                               | 670                                                   | 12.0                                      | 3.5                                       | 4.0                     | -                | Ref [S2] <sup>2</sup> |
| Dir3 (multilayer doped) | 5.5                                    | 526                               | 7000                                                  | 37.0                                      | 14.0                                      | 11.0                    | -                | Ref [S3] <sup>3</sup> |
| Dir4 (multilayer doped) | 6.2                                    | 526                               | 11000                                                 | 24.0                                      | 7.0                                       | 7.0                     | -                | Ref [S3]              |
| Dir5 (multilayer doped) | -                                      | 533                               | 25400                                                 | 13.0                                      | 1.9                                       | 2.9                     | (0.34, 0.63)     | Ref [S4] <sup>4</sup> |
| Dir6 (multilayer doped) | -                                      | 533                               | 25630                                                 | 11.0                                      | 2.4                                       | 3.5                     | (0.34, 0.62)     | Ref [S4]              |
| Dir7 (multilayer doped) | 3.2                                    | 564                               | 46206                                                 | 52.5                                      | 51.2                                      | 17.9                    | -                | Ref [S5] <sup>5</sup> |
| Dir8 (multilayer doped) | 3.1                                    | 598                               | 18410                                                 | 27.2                                      | 19.5                                      | 14.4                    | (0.56, 0.44)     | Ref [S6] <sup>6</sup> |
| Dir9 (multilayer doped) | 7.7                                    | 551                               | >6000                                                 | 9.1                                       | 2.2                                       | 2.6                     | (0.44, 0.54)     | Ref [S7] <sup>7</sup> |
| <i>s</i> -Dir1-dfppz    | 3.0                                    | 518                               | 6475                                                  | 31.2                                      | 18.5                                      | 8.9                     | (0.39, 0.57)     | This work             |
| <i>as</i> -Dir2-dfppz   | 2.7                                    | 517                               | 3368                                                  | 40.0                                      | 14.0                                      | 11.6                    | (0.39, 0.57)     | This work             |
| <i>as</i> -Dir3-ppy     | 4.3                                    | 580                               | 2558                                                  | 38.4                                      | 15.1                                      | 12.9                    | (0.55, 0.44)     | This work             |

<sup>a</sup> The turn on voltage estimated at  $1 \text{ cd m}^{-2}$ ; <sup>b</sup> The maximum luminance; <sup>c</sup> Maximum CE values; <sup>d</sup> Maximum PE values; <sup>e</sup> Maximum EQE values; <sup>f</sup> CIE coordinates.

- 1 S. Bettington, M. Tavasli, M. R. Bryce, A. S. Batsanov, A. L. Thompson, H. A. Al Attar, F. B. Dias and A. P. Monkman, *J. Mater. Chem.*, 2006, **16**, 1046-1052.
- 2 A. M'Hamedi, A. S. Batsanov, M. A. Fox, M. R. Bryce, K. Abdullah, H. A. Al-Attar and A. P. Monkman, *J. Mater. Chem.*, 2012, **22**, 13529-13540.
- 3 Y. Zheng, A. S. Batsanov, M. A. Fox, H. A. Al-Attar, K. Abdullah, V. Jankus, M. R. Bryce and A. P. Monkman, *Angew. Chem., Int. Ed.*, 2014, **53**, 11616-11619.

- 4 A. M'hamedi, M. A. Fox, A. S. Batsanov, H. A. Al-Attar, A. P. Monkman and M. R. Bryce, *J. Mater. Chem. C*, 2017, **5**, 6777-6789.
- 5 X. Yang, Z. Feng, J. Zhao, J.-S. Dang, B. Liu, K. Zhang and G. Zhou, *ACS Appl. Mater. Interfaces*, 2016, **8**, 33874-33887.
- 6 X. Yang, X. Xu, J. S. Dang, G. Zhou, C. L. Ho and W. Y. Wong, *Inorg. Chem.*, 2016, **55**, 1720-1727.
- 7 M. Y. Wong, G. Xie, C. Tourbillon, M. Sandroni, D. B. Cordes, A. M. Slawin, I. D. Samuel and E. Zysman-Colman, *Dalton Trans.*, 2015, **44**, 8419-8432.
